1 **The Min system disassembles FtsZ foci and inhibits polar peptidoglycan remodeling in**

2 ***Bacillus subtilis***

3

4 Yuanchen Yu<sup>1</sup>, Jinsheng Zhou<sup>1</sup>, Felix Dempwolf<sup>2</sup>, Joshua D. Baker<sup>1</sup>, Daniel B. Kearns<sup>2,3</sup>,

5 Stephen C. Jacobson<sup>1,3</sup>

6 <sup>1</sup>Department of Chemistry, Indiana University Bloomington IN USA

7 <sup>2</sup>Department of Biology, Indiana University Bloomington IN USA

8 <sup>3</sup>Co-corresponding authors

9 [dbkearns@indiana.edu](mailto:dbkearns@indiana.edu)

10 [jacobson@indiana.edu](mailto:jacobson@indiana.edu)

11

12

13

14

15

16

17

18

19

20

21

22 Running title: Microfluidic analysis of FtsZ positioning

23 Keywords: FtsZ, MinD, microfluidics, growth, cell division, peptidoglycan

24 **ABSTRACT**

25           A microfluidic system coupled with fluorescence microscopy is a powerful approach for  
26 quantitative analysis of bacterial growth. Here, we measure parameters of growth and dynamic  
27 localization of the cell division initiation protein FtsZ in *Bacillus subtilis*. Consistent with previous  
28 reports, we find that after division FtsZ rings remain at the cell pole, and FtsZ ring disassembly  
29 coincides with rapid Z-ring accumulation at the midcell. In cells mutated for *minD*, however, the  
30 polar FtsZ rings persist indefinitely, suggesting that the primary function of the Min system is in  
31 Z-ring disassembly. The inability to recycle FtsZ monomers in the *minD* mutant results in  
32 maintenance of multiple Z-rings simultaneously, that are restricted by competition for newly  
33 synthesized FtsZ. Whereas the parameters of FtsZ dynamics change in the *minD* mutant, the  
34 overall cell cycle remains the same, albeit with elongated cells necessary to accumulate a  
35 threshold concentration of FtsZ for promoting medial division. Finally, the *minD* mutant  
36 characteristically produces minicells composed of polar peptidoglycan shown to be inert for  
37 remodeling in the wild type. Polar peptidoglycan, however, loses its inert character in the *minD*  
38 mutant suggesting that not only is the Min system important for recycling FtsZ but also may  
39 have a secondary role in the regulation of peptidoglycan remodeling.

40

41 **IMPORTANCE**

42           Many bacteria grow and divide by binary fission in which a mothercell divides into two  
43 identical daughter cells. To produce two equally sized daughters, the division machinery,  
44 guided by FtsZ, must dynamically localize to the midcell each cell cycle. Here, we quantitatively  
45 analyze FtsZ dynamics during growth and find that the Min system of *Bacillus subtilis* is  
46 essential to disassemble FtsZ rings after division. Moreover, a failure to efficiently recycle FtsZ  
47 results in an increase in cell size. Finally, we show that the Min system has an additional role in  
48 inhibiting cell wall turnover and contributes to the “inert” property of cell walls at the poles.

## 49 INTRODUCTION

50 *Bacillus subtilis* is a gram-positive rod-shaped bacterium that grows and divides by a  
51 process called binary fission, in which cells increase in mass and divide into two daughters of  
52 roughly equal size. During growth, the cell elongates by inserting new peptidoglycan into the  
53 lateral cell wall (1). As biomass increases, replication of the chromosome is initiated, and the  
54 chromosomes segregate such that the bulk of the nucleoids become evenly spaced within the  
55 cytoplasm (2). Cell division is initiated near the geometric midpoint of the cell where  
56 peptidoglycan synthesis is reoriented inward towards the cytoplasm to build a septum and  
57 complete cytokinesis (3). Medial positioning of cell division ensures that the septum forms  
58 between the two nucleoids, guaranteeing each daughter receives one copy of the chromosome.  
59 Although the mechanisms governing growth and cell division-site selection are complex, one of  
60 the first factors involved in cell division is the protein, FtsZ.

61 FtsZ is a homolog of eukaryotic tubulin and exists in two different states in the  
62 cytoplasm, either as soluble monomers or in long filamentous polymers called protofilaments (4,  
63 5). The two states rapidly interchange as protofilaments dynamically travel by a process called  
64 treadmilling in which FtsZ monomers are added to one end and lost from the other (4, 6-11).  
65 Treadmilling protofilaments form on the cytoplasmic facing of the membrane and coalesce into a  
66 bright focus called the Z-ring at the nascent site of cell division (12-14). Once mature, the Z-ring  
67 recruits a transmembrane complex of proteins known as the divisome that synthesizes  
68 peptidoglycan on the outside of the cell (15, 16). The Z-ring constricts, either on its own or  
69 aided by divisome-directed peptidoglycan synthesis, until the septum is complete, resulting in  
70 cytokinesis (17, 18). Thus, FtsZ is both dynamic and seemingly static when concentrated at the  
71 site of cell division, and one of the first recognized factors in controlling FtsZ dynamics and  
72 localization is the Min system.

73 The Min system was first discovered in *E. coli* in the form of a mutant that produced  
74 minicells at high frequency (19). Minicells are small, metabolically active, spherical bodies that

75 lack DNA and arise when cell division occurs, not at the midcell, but rather near one cell pole.  
76 Polar division was attributed to a mislocalization of FtsZ rings and the recruitment of the same  
77 machinery that would ordinarily promote medial septation (20). The mutation responsible for  
78 minicell formation was mapped to a genetic locus encoding the membrane-associated ATPase  
79 MinD and the FtsZ-inhibitor MinC (21, 22). MinD is anchored to the membrane by an  
80 amphipathic helix, and MinD recruits and activates MinC by direct interaction (23-30). MinC  
81 binds to the C-terminus of FtsZ and destabilizes the FtsZ ring (31-35). In *E. coli*, the activity of  
82 the MinCD complex is dynamically restricted to the polar region by oscillation in which MinCD  
83 polar polymerization is antagonized by MinE-mediated depolymerization (36-40). In *B. subtilis*  
84 however, the activity of the MinCD complex is statically restricted to membranes with high  
85 curvature by MinJ/DivIVA, such that the entire 4-protein complex assembles at the invaginating  
86 nascent division plane and remains at the cell poles after division (41-46).

87         Here, we use fluorescence microscopy and microfluidics to quantitatively measure  
88 parameters of *B. subtilis* FtsZ dynamics and cell division under the condition of chemostatic  
89 growth for extended periods of time (47-52). The automated poly(dimethylsiloxane) microfluidic  
90 system comprises a pneumatically actuated channel array of 600 channels having widths from  
91 1.0 to 1.6  $\mu\text{m}$  and heights of 1.0  $\mu\text{m}$  to actively trap bacteria cells (52). Integrated pumps and  
92 valves perform on-chip fluid and cell manipulations that provide dynamic control of cell loading  
93 and nutrient flow, and the channel array confines bacterial growth to a single dimension,  
94 facilitating high-resolution, time-lapse imaging and tracking of individual cells over multiple  
95 generations. In wild type cells, we find that Z-rings persist for a period greater than one cell  
96 cycle because Z-rings transiently remain at the cell poles following septum completion. We  
97 further show find that the primary function of the Min system is Z-ring disassembly such that in  
98 the absence of Min, Z-rings persist longer than the duration of the experiment. Indefinite Z-ring  
99 persistence results in cells with multiple Z-rings per compartment, and Z-ring must directly  
100 compete for newly synthesized FtsZ monomers. Moreover, we show that *min* mutant cells are

101 elongated because of a failure to recycle monomers, and competition between multiple Z-rings  
102 necessitates a larger FtsZ pool. Finally, we provide evidence that the *B. subtilis* Min system  
103 also inhibits cell wall turnover, particularly at the poles of the cell, and is a contributing factor to  
104 reports of inter-polar peptidoglycan.

105 **MATERIALS AND METHODS:**

106 **Strains and growth conditions:** *B. subtilis* strains were grown in lysogeny broth (LB) (10 g  
107 tryptone, 5 g yeast extract, 10 g NaCl per L) or on LB plates fortified with 1.5% Bacto agar at  
108 37°C.

109

110 **Microfluidic system:** The microfluidic device was fabricated through a combination of  
111 electron-beam lithography, contact photolithography, and polymer casting (52). Briefly, the  
112 microfluidic device is comprised of fluid and control layers both cast in poly(dimethylsiloxane)  
113 (PDMS) and a glass coverslip. The fluid layer lies between the control layer and glass coverslip  
114 and contains the microchannels and channel array to trap the bacteria. Media and cells are  
115 pumped through the microfluidic channels by on-chip peristaltic pumps and valves that are  
116 controlled pneumatically through the top control layer. Each pneumatic valve is controlled by  
117 software to apply either vacuum (0.3 bar) or pressure (1.3 bar) to open or close individual  
118 valves, respectively. Device fabrication design details are included in Figure S1.

119

120 **On-device cell culture:** Prior to loading cells into the microfluidic device, the fluidic channels  
121 were coated with 1% bovine serum albumin (BSA) for 1 h to act as a passivation layer. Then, all  
122 the channels were filled with 1 mM IPTG, 0.1% BSA in Luria-Bertani (LB) media (10 g tryptone,  
123 5 g yeast extract, 10 g NaCl per L). A saturated culture of cells (~25  $\mu$ L) was added through the  
124 cell reservoir and pumped into the cell-trapping region. During cell loading, vacuum was applied  
125 to the control layer above to open the membrane region. After a sufficient number of cells were  
126 pumped underneath the channel array, positive pressure was applied to trap individual cells in  
127 those channels. Media was pumped through the microchannels to flush away excess cells. After  
128 excess cells were pumped away, media was continuously flowed through the microchannels by  
129 gravity flow during the entire experiment.

130

131 **Time-lapse image acquisition:** Steady state cell growth was monitored from 3 to 21 h post  
132 inoculation. Fluorescence microscopy was performed on a Nikon Eclipse Ti-E microscope and  
133 an Olympus IX83 microscope. The Nikon Eclipse Ti-E microscope was equipped with a 100x  
134 Plan Apo lambda, phase contrast, 1.45 N.A., oil immersion objective and a Photometrics  
135 Prime95B sCMOS camera with Nikon Elements software (Nikon, Inc.). Fluorescence signals  
136 from mCherry and mNeogreen were captured from a Lumencor SpectraX light engine with  
137 matched mCherry and YFP filter sets, respectively, from Chroma. The Olympus IX83  
138 microscope was equipped with an Olympus UApo N 100x/1.49 Oil objective and a Hamamatsu  
139 EM-CCD Digital Camera operated with MetaMorph Advanced software. Fluorescence signals  
140 from mCherry, mNeogreen and BADA were captured from an Olympus U-HGLGPS  
141 fluorescence light source with matched TRITC and GFP filters, respectively, from Semrock.  
142 Images were captured from at least eight fields of view at a 2 min interval. The channel array  
143 was maintained at 37°C with an objective warmer. For all direct comparisons, the same  
144 microscope and settings were used.

145  
146 **Data analysis:** A period of adaptation following exposure to illumination was observed; thus,  
147 data analysis was restricted to periods of steady state. Cell identification and tracking were  
148 analyzed by a series of MATLAB programs (The MathWorks, Inc.) (52). The program extracted  
149 fluorescence intensity along a line profile down the longitudinal center of each sub-micron  
150 channel. The cytoplasmic mCherry line profile showed a flat topped peak on the line where a  
151 cell was located, and a local 20% decrease in fluorescence intensity was used to identify cell  
152 boundaries after division. Division events were conservatively measured as the time at which  
153 one cell became two according to the decrease in fluorescence intensity as described above.  
154 Moreover, cell bodies were tracked from frame to frame in order to construct lineages of cell  
155 division. The mNeogreen-FtsZ signal was similarly tracked and measured along the length of

156 the cell. The FtsZ line profile was normalized by cell body intensity in order to minimize intensity  
157 differences among frames and different fields of view.

158

159 **Fluorescent D-amino acid labeling:** The fluorescent D-amino acid, BADA, was supplied by  
160 VanNieuwenhze and Brun labs. To create BADA, 3-amino-D-alanine was conjugated to  
161 BODIPY-FL (53, 54). Stock solutions of BADA (100 mM) were prepared in dimethylsulfoxide  
162 (DMSO) as they were poorly soluble in water. The stock solutions were then diluted with LB  
163 media to 1 mM BADA with < 2% (vol/vol) DMSO left. To label the cells 3 h post inoculation, the  
164 BADA solution (1 mM) was continually pumped through the channel array for 4 min. Excess dye  
165 was washed away by pumping LB media through the channel array for 4 min. Fluorescent  
166 images were captured at a 2 min interval from at least eight fields of view.

167

168

169



170 **RESULTS**

171 **The Min system is required for FtsZ ring disassembly.** Quantitative microscopic analysis of  
172 cell growth and division on agarose pads is restricted by the limited number of generations that  
173 can be observed under batch conditions. To circumvent this problem, a microfluidic-based  
174 approach was undertaken to monitor steady-state chemostatic growth of *B. subtilis* over many  
175 generations (**Fig S1**). *B. subtilis* divides by septation (or plate formation) in which a division  
176 septum is formed first, and remodeling of the septal peptidoglycan occurs as a separate step  
177 afterwards that leads to indentation and cell separation (55-57). Thus, cell division events were  
178 conservatively defined as a spatial decrease in constitutively-expressed cytoplasmic mCherry  
179 fluorescent signal that would indicate cellular indentation (**Fig 1A**). Images were captured every  
180 two minutes, and the fluorescence intensity was measured along the length of the microfluidic  
181 channel. After inoculation into the microfluidic device, a period of roughly three hours elapsed  
182 during which cells appeared to adjust to the growth conditions, and steady-state growth was  
183 maintained and monitored over the next 21 hours (**Movie S1**). Microscopic analysis of the rate  
184 of septum formation indicated that wild type cells grew with a cell cycle of  $39 \pm 12$  min (**Fig 2A**).

185 Cell division is mediated by dynamic localization of the division initiation protein, FtsZ (8,  
186 9, 12, 14). FtsZ dynamics were monitored by fluorescence microscopy in a strain encoding an  
187 N-terminal fluorescent fusion of mNeogreen introduced at the native site in the chromosome  
188 (9). Images were captured every two minutes, and the fluorescence intensity magnitude of FtsZ  
189 was measured as a snapshot in the context of a fluorescent mCherry cytoplasmic signal (**Fig**  
190 **1A**). During steady state growth, FtsZ appeared as a faint uniform cytoplasmic haze with bands  
191 of enhanced fluorescence intensity, and a kymograph was generated to track FtsZ dynamics in  
192 temporal relation to the cell body (**Fig 3A, Fig 1A, Movie S2**). The FtsZ-ring appearance  
193 period, defined as the time between the formation of one Z-ring and the formation of another,  
194 was found to be similar to that of the cell division period (**Fig 4, Fig S2A**). The Z-ring  
195 persistence period, defined as the time between appearance and disappearance of a single

196 focus, was longer than the average period of cell division (**Fig 4, Fig S2B**) likely because FtsZ  
197 has been observed to remain transiently at the cell pole after cytokinesis (13, 46, 58).  
198 Consistent with previous observations, many cells exhibited a characteristic peak of FtsZ  
199 fluorescence intensity near midcell to mediate division, but some cells instead exhibited peak  
200 fluorescence at the cell pole after division was complete (**Fig 5A**). We conclude that FtsZ  
201 remains polarly localized after cytokinesis.

202 To further explore Z-ring dynamics in the wild type, 100 cells were chosen at random,  
203 and a variety of parameters were manually measured. The Z-ring polar duration, defined as the  
204 time between septation and the disappearance of the Z-ring (**Fig 4, Fig S2C**) was longer than,  
205 and overlapped with, the Z-ring medial delay (**Fig 4, Fig S2D**), defined as the time between  
206 septation and the formation of a new Z-ring. Thus, wild type cells transiently experienced  
207 multiple FtsZ rings per compartment. Moreover, dissolution of the polar Z-ring coincided with  
208 the Z-ring maturation period (**Fig 4, Fig S2E**), defined as the time from first appearance of the  
209 Z-ring until maximum Z-ring fluorescence intensity, as FtsZ subunits were redistributed from the  
210 pole to the midcell. Finally, the cytokinetic period, defined as the time between Z-ring  
211 appearance and cell division was approximately  $33 \pm 8$  min (**Fig 4, Fig S2F**), which when added  
212 to the Z-ring medial delay, ultimately produced a value similar to the cell cycle period ( $39 \pm 12$   
213 min) (**Fig 4**). We conclude that the dynamic parameters of FtsZ are consistent with a regular  
214 cell division cycle despite the transient localization of the Z-ring at the poles.

215 One mechanism that governs FtsZ localization is the Min system (20, 21, 59). To  
216 explore the consequences of disruption of the Min system quantitatively, a mutation was  
217 introduced in the gene encoding MinD, the membrane localized activator of the FtsZ-inhibitor  
218 protein MinC, and the *minD* mutant was monitored during growth in microfluidic channels (**Fig**  
219 **1B**). Consistent with a *min* phenotype, the *minD* mutant produced two different cell types: cells  
220 that were longer than wild type and very short minicells (**Fig 5B; Movie S3**) (19, 21, 22, 60).  
221 Cells mutated for MinD produced multiple FtsZ foci (61) (**Fig 1B; Movie S4**) and kymograph

222 analysis indicated that the FtsZ-ring persistence period was indefinite such that once formed,  
223 the focus did not disappear during the timecourse of observation (**Fig 3B**). Moreover, a greater  
224 proportion of *minD* mutant cells exhibited peak FtsZ fluorescence intensity at the poles (**Fig 5C**).  
225 We conclude that when a cell divides, the FtsZ focus is split into each daughter cell. In the wild  
226 type, the polar FtsZ ring is transient due to antagonism by Min, but in the absence of Min, the  
227 ring persists. Our data support models in which the primary function of the Min system during  
228 division is to promote FtsZ ring disassembly rather than preventing its formation (23, 46, 62).

229

230 **The Min system maintains cell size by recycling FtsZ.** Mother cells of the *minD* mutant ( $8.8$   
231  $\pm 3.4$   $\mu\text{m}$ , not including minicells) were on average twice as long as the wild type ( $4.5 \pm 1.7$   $\mu\text{m}$ )  
232 (**Fig 5B**), but the reason *min* mutants were elongated was unclear. One early model suggested  
233 that *min* mutants were longer because divisions that produced minicells came at the expense of  
234 medial divisions (60, 63). Microscopic analysis, however, indicated that the division time in the  
235 *minD* mutant occurred slightly more rapidly than the wild type (**Fig 2A**). By considering divisions  
236 that gave rise to different cell types separately, one quarter of all division events in *minD* gave  
237 rise to minicells, and three quarters of division events occurred along the midcell to produce two  
238 viable daughters with chromosomes (**Fig 2B**). Thus, midcell divisions occurred at roughly the  
239 same average rate as the wild type albeit with a higher standard deviation (**Fig 2B**). The wide  
240 variance was due to the occasional longer-than-average division times that gave rise to very  
241 long cells which then experienced shorter-than-average division times with multiple division  
242 events per compartment that could occur simultaneously or slightly offset from one another (**Fig**  
243 **6**) (19, 64). We conclude that *min* mutants experience medial division at approximately the  
244 same rate as the wild type, and thus, *min* cells are not elongated because polar septation  
245 comes at the expense of medial division.

246 Another factor that could contribute to cell length is the rate of cell elongation, as a faster  
247 elongation rate relative to the division rate could give rise to longer cells. By measuring the rate

248 at which the cell poles moved away from one another, the *minD* mutant appeared to elongate  
249 more rapidly than the wild type (**Fig 2C**). Elongation, however, occurs by the lateral synthesis of  
250 cell wall material distributed along the length of the rod (65-67), and thus, the *minD* mutant  
251 might appear to elongate more rapidly simply because longer cells have more positions in  
252 between the poles in which to insert new cell wall material per unit time. However, the  
253 instantaneous elongation rate, defined as the rate of elongation divided by the length of the cell,  
254 was similar for both the wild type and *minD* mutant (**Fig 2D**). Moreover, cells of the wild type  
255 and the *minD* mutant accumulated biomass at the same rate as both had indistinguishable  
256 growth curves by optical density measurement in broth culture (**Fig 2E**). We conclude the cells  
257 of the *minD* mutant elongate at the same rate as the wild type, and thus, the elongation rate  
258 cannot explain the presence of elongated cells.

259 Another possible explanation for the increased cell size of *min* mutants is a reduced rate  
260 at which FtsZ monomers are added to form FtsZ rings. “Adder” hypotheses for cell growth  
261 predict that cell size is dictated by the accumulation of a critical threshold concentration of a  
262 particular cell component, in this case, FtsZ (60, 68-70). One requirement for the adder  
263 hypothesis is that the rate of FtsZ accumulation must be constant. With respect to FtsZ  
264 accumulation, the magnitude of peak FtsZ fluorescence intensity was higher in the wild type  
265 than the *minD* mutant (**Fig 5D**), but the *minD* mutant exhibited higher total fluorescence intensity  
266 per cell (**Fig 5E**). The higher total fluorescence intensity per cell may be due to the fact that the  
267 *minD* cells are longer and maintain multiple Z-rings per compartment. Indeed, when  
268 fluorescence intensity was divided by cell length, FtsZ density was found to be nearly identical  
269 in both *minD* and the wild type. Thus, the rate of FtsZ synthesis was constant, and FtsZ  
270 accumulation was proportional to cell size (**Fig 5F**). We conclude the *minD* mutant cells are  
271 elongated because old Z-rings are not recycled, and the cell needs more time and, thus, more  
272 biomass to accumulate FtsZ sufficient to form and mature a new Z-ring. We further infer that Z-

273 ring formation and, subsequently, cell division in *minD* directly depend on the rate of *de novo*  
274 FtsZ synthesis.

275         If FtsZ density accumulated at a rate proportional to cell length (**Fig 5F**), and the *minD*  
276 mutant constitutively maintained multiple Z rings, new FtsZ monomers synthesized during  
277 growth were likely divided between multiple foci, effectively reducing the rate of local FtsZ  
278 accumulation that gives rise to cytokinesis. Indeed, the nascent Z-rings of the *minD* mutant  
279 exhibited a 2-3 fold increase in maturation time (**Fig 4, Fig S2E**), likely because the old rings  
280 were not dissolved, and each Z-ring independently competed for newly synthesized subunits.  
281 We note that the cytokinetic period between FtsZ formation and septation was 2-3 fold longer  
282 (**Fig 4, Fig S2F**), suggesting that regeneration of cell division machinery was also delayed.  
283 Paradoxically, the cytokinetic period was substantially longer than the cell cycle (**Fig 4**). Each  
284 daughter cell of the *minD* mutant, however, was born with at least three persistent Z-rings, one  
285 at each pole and one at the future midcell, and additional Z-rings formed at the one-quarter and  
286 three-quarter position as the cells grew (**Fig 5C**). Thus, division at the most central Z-ring  
287 allowed daughter cells to be born with a preformed medial ring that would eventually drive  
288 septation, and as a result the medial Z-ring delay time for *minD* had a negative value (**Fig 4, Fig**  
289 **S2D**). Despite aberrations in Z-ring parameters, the *minD* mutant still maintained a similar cell  
290 cycle time as the wild type, correlated not with the cytokinetic period but rather with the rate of  
291 FtsZ ring appearance (**Fig 4, Fig S2A**). We conclude that the Min system disassembles polar  
292 Z-rings to recycle and redistribute monomer units, thereby promoting rapid, singular FtsZ  
293 accumulation and maturation at a medial site for the proper maintenance of both the cytokinetic  
294 period and cell length (**Fig 4**).

295

296 **The Min system inhibits peptidoglycan turnover, especially at the cell poles.** Mutants  
297 defective in the Min system not only produce longer cells but also produce minicells by division  
298 at the cell poles. Peptidoglycan at the cell poles is traditionally considered to be “inert” such that

299 once synthesized, it experiences little *de novo* synthesis and turnover (67, 71-73). To study  
300 how minicells formed, cells in the microfluidic device were presented with a sub-generational (4  
301 min) impulse of fluorescent D-amino acids that can be incorporated into peptidoglycan during  
302 either synthesis or remodeling (53, 54). In wild type, fluorescent peptidoglycan signal was  
303 incorporated along the central part of the cell body with peak fluorescence at the nascent  
304 division planes (**Fig 1C**). Moreover, the troughs of peptidoglycan fluorescence intensity  
305 coincided with troughs of cytoplasmic fluorescence intensity consistent with the idea that polar  
306 peptidoglycan was less dynamic than other positions (**Fig 1C**). Peptidoglycan staining of the  
307 *minD* mutant, however, appeared more intense and more uniform than the wild type (**Fig 1D**).  
308 In both wild type and the *minD* mutant, peptidoglycan staining was proportional to cell length,  
309 but the *minD* mutant accumulated more stain per unit length (**Fig 7A**). Also, unlike the wild  
310 type, troughs in cytoplasmic staining intensity in the *minD* mutant did not correspond to  
311 decreases in peptidoglycan staining at the cell poles (**Fig 1D**). We conclude that the Min  
312 system inhibits peptidoglycan synthesis/remodeling and is an important factor in making the  
313 polar peptidoglycan appear “inert”.

314 We next wanted to determine how the *minD* mutant appeared to accumulate more  
315 fluorescent peptidoglycan signal. As above, cells were stained with a 4-min impulse of  
316 fluorescent D-amino acids after which, the fluorescent D-amino acids were replaced with  
317 unlabeled D-amino acids in the growth medium such that the fluorescence signal would be  
318 gradually lost during growth (**Movie S5,S6**). When the amount of fluorescence signal per cell  
319 was projected per unit time, *minD* mutant cells with chromosomes experienced a greater overall  
320 rate of fluorescence decay than the wild type or *minD* mutant minicells (**Fig 7 B,C, Fig S3 A,B**).  
321 Consistent with inert polar peptidoglycan in the wild type, the most intense staining occurred at  
322 the nascent division plane, which upon becoming a cell pole remained fluorescent for an  
323 extended period of time (**Fig 7D**). The *minD* mutant, however, did not exhibit intense staining at  
324 the division plane, and polar staining persisted primarily in minicells (**Fig 7E**). We conclude that

325 the Min system, at least in *B. subtilis*, appears to restrict peptidoglycan remodeling throughout  
326 the cell but has the greatest effect at the cell poles.

327 Minicells are thought to be physiologically similar to wild type cells due to inheritance of  
328 cytoplasmic and membrane proteins, but they lack chromosomes and do not grow. One reason  
329 minicells might not grow is that they were thought to be surrounded exclusively by inert polar  
330 peptidoglycan, but poles of the *minD* mutant appeared much less inert than the wild type (**Fig**  
331 **1D**). To further explore the dynamics of polar peptidoglycan observed in the *minD* mutant, the  
332 mutant was stained for a longer period of time (20 min). Prolonged exposure of the *minD*  
333 mutant to fluorescent D-amino acids resulted in staining of minicell peptidoglycan but only in the  
334 most recently formed minicells (**Fig 8**). In each case the entire circumference of the minicell  
335 was stained uniformly indicating that old cell pole peptidoglycan was being remodeled at a rate  
336 equivalent to the synthesis of the nascent plane (**Fig 8**). Little to no fluorescence was observed  
337 in older minicells suggesting that minicells rapidly lost their ability to remodel peptidoglycan (**Fig**  
338 **8**). We conclude that minicells transiently retain the ability to remodel peptidoglycan, and that  
339 the rapid loss of remodeling capacity may be responsible for the inability of minicells to grow.  
340 Combined, our microfluidic analysis indicates that the Min system in *B. subtilis* is multifunctional:  
341 Min not only disassembles polar FtsZ-rings but also restricts polar peptidoglycan remodeling.

342

343

344

## 345 DISCUSSION

346 Binary fission of rod-shaped bacteria is considered one of the simplest forms of cell  
347 division, but it is nonetheless complex. Cells elongate by directing envelope synthesis parallel  
348 to the long axis of the cell but must periodically reorient envelope synthesis perpendicular to the  
349 long axis to promote cytokinesis. FtsZ forms a ring-like scaffold to recruit the cytokinetic  
350 complex for perpendicular peptidoglycan synthesis, and the Min system is thought to help guide  
351 FtsZ localization. Here, we quantitatively measure growth and FtsZ dynamics in wild type and a  
352 *minD* mutant of *B. subtilis* with a microfluidic device and fluorescence microscopy. We find that  
353 the primary function of the Min system is to disassemble FtsZ rings and recycle FtsZ monomers.  
354 A failure to recycle FtsZ monomers has a number of consequences on FtsZ dynamics, including  
355 the constitutive maintenance of multiple Z-rings per compartment and a longer cytokinetic  
356 period. Despite alternations in FtsZ dynamics, however, we find that the *minD* cell cycle is  
357 nonetheless much like wild type cell cycle. Moreover, the *min* mutants are so named because  
358 they produce small anucleate minicells made exclusively of polar peptidoglycan thought to be  
359 relatively inert. Here, we provide evidence that the Min system is responsible for inhibiting polar  
360 peptidoglycan turnover and that minicells transiently retain peptidoglycan remodeling capacity.

361 The function of the Min system is often described as promoting medial Z-ring formation  
362 by preventing FtsZ-ring formation at the poles, but our data, along with others, suggest  
363 otherwise, at least in *B. subtilis*. Rather than preventing Z-ring assembly, Min is required for  
364 FtsZ ring disassembly (23, 30, 35, 46, 62, 74). Evidence that Min does not occlude polar Z-  
365 rings comes from spore outgrowth experiments which indicate that FtsZ preferentially localizes  
366 to the midcell even when *minD* is mutated, and thus, the *min* phenotype does not manifest in  
367 the first generation (75, 76). Instead, FtsZ transiently remains at the cell pole after division and  
368 is redistributed to the midcell by the action of Min, such that in the absence of the Min system,  
369 FtsZ rings are divided into each new daughter but never dissolve. A Z-ring disassembly model  
370 is also consistent with the fact that the Min system co-localizes with nascent septa behind the



371 constricting ring and only encounters FtsZ after septation has completed (77). A disassembly  
372 function is also supported by genetic evidence showing that mutants with enhanced Z-ring  
373 stability are resistant to the effects of MinCD and mutants with reduced Z-ring stability have  
374 enhanced sensitivity (33, 78, 79). That FtsZ may require a specific disassembly factor may also  
375 be consistent with the division of *Streptococcus pneumoniae*, which naturally lacks the Min  
376 system and produces Z-foci that are not depolymerized. These Z-foci, instead, continually  
377 treadmill from the old division site to the new (73).

378         The inability to disassemble Z-rings and recycle FtsZ monomers also explains cell length  
379 defects associated with *min* mutants. *min* mutants have long been observed to not only  
380 produce minicells but also have mother cells that are longer than the wild type (19, 21, 22, 60).  
381 Here, we show that *min* mutants were not elongated due to an extended division time or  
382 increased elongation rate but rather due to the dynamics of FtsZ accumulation. In the absence  
383 of Min, the persistence of the Z-ring becomes infinite, and cells maintain multiple Z-rings per  
384 compartment. Because the density of FtsZ is constant, each Z-ring is forced to compete for  
385 newly synthesized FtsZ monomers. Thus, the 2-3 fold increase in cell length was correlated  
386 with a 2-3 fold increase in Z-ring maturation time. Our results are consistent with the “adder”  
387 hypothesis for growth and cell length control, as *min* mutant cells must become longer to  
388 achieve a critical threshold of FtsZ to promote cell division (60, 68-70). Additionally, we  
389 observed that the *minD* mutant had a 2-3 fold increase in the cytokinetic period. We conclude  
390 that not only was there a failure to recycle FtsZ, but cell division machinery was co-sequestered  
391 at latent Z-rings and also required *de novo* synthesis for regeneration (74).

392         Min-mediated disassembly of the latent polar Z-ring coincided with rapid accumulation of  
393 a medial Z-ring in the wild type cell cycle. Despite defects in FtsZ dynamics, the *minD* mutant  
394 did not suffer a defect in either growth rate or division time, suggesting that the cell cycle was  
395 robust and depended on another factor. In the absence of Min, the cytokinetic period exceeded  
396 the cell cycle time, Z-ring formation that would give rise to the future division was initiated in the

397 preceding generation. Thus, much like how multifork replication allows daughters to inherit  
398 partially replicated chromosomes and grow faster than the replication period, daughter cells  
399 inherit a mature Z-ring to complete the cell cycle on time and assemble two new Z-rings for the  
400 next generation. Ultimately, the cell cycle of the *min* mutant is governed by the rate of Z-ring  
401 appearance, but what governs the Z-ring appearance rate is unclear. One likely regulator of Z-  
402 rings is the chromosome because Z-rings are prevented from forming over the mass of the  
403 genetic material by nucleoid occlusion (80, 81). We infer that the cell cycle is preserved  
404 because the regular period of chromosome replication and segregation dictates the rate at  
405 which Z-rings appear, and we note that the Z-ring appearance period is similar to the replication  
406 period reported in *B. subtilis* (58, 82, 83).

407 The failure to disassemble Z-rings in the absence of Min leaves behind a preformed  
408 polar Z-ring that can give rise to polar cytokinesis and results in the classic phenotype of  
409 minicell division. We note, however, that despite the fact that each daughter inherits three Z-  
410 rings, two at the pole and one at the midcell, and each Z-ring sequesters division machinery, the  
411 division events that gave rise to minicells were nonetheless rare. Competition between the Z-  
412 rings for newly synthesized FtsZ monomers and divisome components is unequal, such that the  
413 medial Z-ring is stochastically favored. We suspect that medial rings are favored because they  
414 are flanked on either side by two chromosomes, each expressing divisome components, and  
415 polar Z-rings are disfavored by diffusion being proximal to only one chromosome. Consistent  
416 with a positional bias in diffusion-and-capture, medial divisions occur at approximately twice the  
417 frequency of minicell divisions, and we found that minicell formation at the new and old pole was  
418 equally probable (**Fig 2F**). Regardless on which side of the cell polar-division occurs, the  
419 minicell compartment is reduced to a sphere in which half of the peptidoglycan comes from one  
420 pole and half comes from the nascent septation event.

421 Polar peptidoglycan of rod-shaped cells has traditionally been considered to be “inert”  
422 such that it experiences reduced rates of remodeling relative to the length of the cell. What

423 makes poles behave as though they are inert, however, is unknown. Here, we use a dye that  
424 stains peptidoglycan either during synthesis or remodeling to show that in the absence of Min,  
425 polar peptidoglycan is indistinguishable from the rest of the cell. How MinD, a protein in the  
426 cytoplasm would inhibit peptidoglycan remodeling extracellularly is unclear, but we note the *B.*  
427 *subtilis* Min system interacts with a polarly-localized multi-pass transmembrane protein, MinJ  
428 (43, 44). MinJ has recently been shown to interact with RodZ, a protein involved in  
429 peptidoglycan synthesis/remodeling, and perhaps the MinCDJ complex keeps RodZ away from  
430 the poles (84-87). Moreover, why minicells fail to grow is poorly understood, but perhaps, they  
431 quickly lose the ability to remodel their peptidoglycan. The loss of remodeling capacity could be  
432 due to both the degradation of a single required protein and its corresponding transcript, but we  
433 note that the most substantial difference between mother cells and minicells of a *minD* mutant is  
434 the absence of the chromosome. Thus, the chromosome may not only direct the cell division  
435 cycle, but its presence may either directly or indirectly dictate cell envelope remodeling, and we  
436 note that RodZ is a transmembrane protein with a cytoplasmic DNA binding domain (58, 84, 86,  
437 88).  
438

439 **ACKNOWLEDGEMENTS**

440 We thank Yves Brun and Mike VanNieuwenhze for material support and helpful comments. The  
441 work was supported by NIH grant R35 GM131783 to DBK and NIH grant R01 GM113172 to SJ.

442 **Table 1: Strains**

443

| Strain | Genotype                                                                     |
|--------|------------------------------------------------------------------------------|
| DK4393 | $\Delta hag \Delta epsE amyE::P_{hyspank}-mCherry spec$                      |
| DK4407 | $\Delta hag \Delta epsE amyE::P_{hyspank}-mCherry spec minD::TnYLB kan$      |
| DK5133 | $\Delta epsH mNeongreen-ftsZ amyE::P_{hyspank}-mCherry spec$                 |
| DK5155 | $\Delta epsH mNeongreen-ftsZ amyE::P_{hyspank}-mCherry spec minD::TnYLB kan$ |

444

445

446 **REFERENCES**

- 447
- 448 1. **Höltje J-V.** 1998. Growth of the stress-bearing and shape-maintaining murein sacculus
- 449 of *Escherichia coli*. *Microbiol Mol Biol Rev* **62**:181-203.
- 450 2. **Wang X, Llopis PM, Rudner DZ.** 2013. Organization and segregation of bacterial
- 451 chromosomes. *Nat Rev Genet* **14**:191-203.
- 452 3. **Errington J, Daniel RA, Scheffers D-J.** 2003. Cytokinesis in bacteria. *Microbiol Mol*
- 453 *Biol Rev* **67**:52-65.
- 454 4. **de Boer P, Crossley R, Rothfield L.** 1992. The essential bacterial cell-division protein
- 455 FtsZ is a GTPase. *Nature* **359**:254-256.
- 456 5. **Erickson HP.** 1995. FtsZ, a prokaryotic homolog of tubulin? *Cell* **80**:367-370.
- 457 6. **Mukherjee A, Lutkenhaus J.** 1994. Guanine nucleotide-dependent assembly of FtsZ
- 458 into filaments. *J Bacteriol* **176**:2754-2758.
- 459 7. **Mukherjee A, Lutkenhaus J.** 1998. Dynamic assembly of FtsZ regulated by GTP
- 460 hydrolysis. *EMBO J* **17**:462-469.
- 461 8. **Stricker J, Maddox P, Salmon ED, Erickson HP.** 2002. Rapid assembly dynamics of
- 462 the *Escherichia coli* FtsZ-ring demonstrated by fluorescence recovery after
- 463 photobleaching. *Proc Natl Acad Sci USA* **99**:3171-3175.
- 464 9. **Bisson-Filho AW, Hsu Y-P, Squyers GR, Kuru E, Wu F, Jukes C, Sun Y, Dekker C,**
- 465 **Holden S, VanNieuwenhze MS, Brun YV, Garner EC.** 2017. Treadmilling by FtsZ
- 466 filaments drives peptidoglycan synthesis and bacterial cell division. *Science* **355**:739-
- 467 743.
- 468 10. **Yang X, Lyu X, Miguel A, McQuillen R, Huang KC, Xiao J.** 2017. GTPase activity-
- 469 coupled treadmilling of the bacterial tubulin FtsZ organizes septal cell wall synthesis.
- 470 *Science* **355**:744-747.
- 471 11. **Perez AJ, Cesbron Y, Shaw SL, Villicana JB, Tsui H-CT, Boersma MJ, Ye ZA,**
- 472 **Tovpeko Y, Dekker C, Holden S, Winkler ME.** 2019. Movement dynamics of divisome
- 473 proteins and Pbp2x: FtsW in cells of *Streptococcus pneumoniae*. *Proc Natl Acad Sci*
- 474 *USA* **116**:3211-3220.
- 475 12. **Bi E, Lutkenhaus J.** 1991. FtsZ ring structure associated with division in *Escherichia*
- 476 *coli*. *Nature* **354**:161-164.
- 477 13. **Levin PA, Losick R.** 1996. Transcription factor Spo0A switches the localization of the
- 478 cell division protein FtsZ from a medial to a bipolar pattern in *Bacillus subtilis*. *Genes*
- 479 *Dev* **10**:478-488.
- 480 14. **Ma X, Ehrhardt DW, Margolin W.** 1996. Colocalization of cell division proteins FtsZ
- 481 and FtsA to cytoskeletal structures in living *Escherichia coli* cells by using green
- 482 fluorescent protein. *Proc Natl Acad Sci USA* **93**:12998-13003.
- 483 15. **Goehring NW, Gueiros-Filho F, Beckwith J.** 2005. Premature targeting of a cell
- 484 division protein to midcell allows dissection of divisome assembly in *Escherichia coli*.
- 485 *Gene Dev* **19**:127-137.
- 486 16. **Weiss DS, Chen JC, Ghigo J-M, Boyd D, Beckwith J.** 1999. Localization of FtsI
- 487 (PBP3) to the septal ring requires its membrane anchor, the Z ring, FtsA, FtsQ, and
- 488 FtsL. *J Bacteriol* **181**:508-520.
- 489 17. **Addinall SG, Lutkenhaus J.** 1996. FtsZ-spirals and -arcs determine the shape of the
- 490 invaginating septa in some mutants of *Escherichia coli*. *Mol Microbiol* **22**:231-237.
- 491 18. **Osawa M, Anderson DE, Erickson HP.** 2008. Reconstitution of contractile FtsZ rings
- 492 in liposomes. *Science* **320**:792-794.

- 493 19. **Adler HI, Fisher WD, Cohen A, Hardigree AA.** 1967. Miniature *Escherichia coli* cells  
494 deficient in DNA. Proc Natl Acad Sci USA **57**:321-326.
- 495 20. **Bi E, Lutkenhaus J.** 1993. Cell division inhibitors SulA and MinCD prevent formation  
496 of the FtsZ ring. J Bacteriol **175**:1118-1125.
- 497 21. **de Boer PAJ, Crossley RE, Rothfield LI.** 1989. A division inhibitor and a topological  
498 specificity factor coded for by the minicell locus determine proper placement of the  
499 division septum in *E. coli*. Cell **56**:641-649.
- 500 22. **Varley AW, Stewart GC.** 1992. The *divIVA* region of the *Bacillus subtilis* chromosome  
501 encodes homologs of *Escherichia coli* septum placement (MinCD) and cell  
502 shape (MreBCD) determinants. J Bacteriol **174**:6729-6742.
- 503 23. **Hu Z, Mukherjee A, Pichoff S, Lutkenhaus J.** 1999. The MinC component of the  
504 division site selection system in *Escherichia coli* interacts with FtsZ to prevent  
505 polymerization. Proc Natl Acad Sci USA **96**:14819-14824.
- 506 24. **Huang J, Cao C, Lutkenhaus J.** 1996. Interaction between FtsZ and inhibitors of cell  
507 division. J Bacteriol **178**:5080-5085.
- 508 25. **Mulder E, Woldringh CL, Tétart F, Bouché J-P.** 1992. New *minC* mutations suggest  
509 different interactions of the same region of division inhibitor MinC with proteins specific  
510 for *minD* and *dicB* coinhibition pathways. J Bacteriol **174**:35-39.
- 511 26. **Hu Z, Lutkenhaus J.** 2003. A conserved sequence at the C-terminus of MinD is  
512 required for binding to the membrane and targeting MinC to the septum. Mol Microbiol  
513 **47**:345-355.
- 514 27. **Szeto TH, Rowland SL, Habrukowich CL, King GF.** 2003. The MinD membrane  
515 targeting sequence is a transplantable lipid-binding helix. J Biol Chem **278**:40050-  
516 40056.
- 517 28. **Hu Z, Saez C, Lutkenhaus J.** 2003. Recruitment of MinC, an inhibitor of Z-ring  
518 formation, to the membrane of *Escherichia coli*: role of MinD and MinE. J Bacteriol  
519 **185**:196-203.
- 520 29. **Lackner LL, Raskin DM, de Boer PAJ.** 2003. ATP-dependent interactions between  
521 *Escherichia coli* Min proteins and the phospholipid membrane in vitro. J Bacteriol  
522 **185**:735-749.
- 523 30. **Park K-T, Dajkovic A, Wissel M, Du S, Lutkenhaus J.** 2018. MinC and FtsZ mutant  
524 analysis provides insight into MinC/MinD-mediated Z ring disassembly. J Biol Chem  
525 **293**:5834-5846.
- 526 31. **Dajkovic A, Lan G, Sun SX, Wirtz D, Lutkenhaus J.** 2008. MinC spatially controls  
527 bacterial cytokinesis by antagonizing the scaffolding function of FtsZ. Curr Biol **18**:235-  
528 244.
- 529 32. **de Boer PAJ, Crossley RE, Rothfield L.** 1992. Roles of MinC and MinD in the site-  
530 specific septation block mediated by the MinCDE system of *Escherichia coli*. J Bacteriol  
531 **174**:63-70.
- 532 33. **de Oliveira IFF, de Sousa Borges A, Kooij V, Bartosiak-Jentys J, Luirink J,  
533 Scheffers D-J.** 2010. Characterization of *ftsZ* mutations that render *Bacillus subtilis*  
534 resistant to MinC. PLoS One **5**:e12048.
- 535 34. **Shen B, Lutkenhaus J.** 2009. The conserved C-terminal tail of FtsZ is required for the  
536 septal localization and division inhibitory activity of MinC<sup>C</sup>/MinD. Mol Microbiol **72**:410-  
537 424.
- 538 35. **Shen B, Lutkenhaus J.** 2010. Examination of the interaction between FtsZ and MinC<sup>N</sup>  
539 in *E. coli* suggests how MinC disrupts Z rings. Mol Microbiol **75**:1285-1298.

- 540 36. **Raskin DM, de Boer PAJ.** 1999. Rapid pole-to-pole oscillation of a protein required for  
541 directing division to the middle of *Escherichia coli*. Proc Natl Acad Sci USA **96**:4971-  
542 4976.
- 543 37. **Hale CA, Meinhardt H, de Boer PAJ.** 2001. Dynamic localization cycle of the cell  
544 division regulator MinE in *Escherichia coli*. EMBO J **20**:1563-1572.
- 545 38. **Meinhardt H, de Boer PAJ.** 2001. Pattern formation in *Escherichia coli*: a model for  
546 the pole-to-pole oscillations of Min proteins and the localization of the division site. Proc  
547 Natl Acad Sci USA **98**:14202-14207.
- 548 39. **Hu Z, Lutkenhaus J.** 2001. Topological regulation of cell division in *E. coli*:  
549 spatiotemporal oscillation of MinD requires stimulation of its ATPase by MinE and  
550 phospholipid. Mol Cell **7**:1337-1343.
- 551 40. **Hu Z, Gogol EP, Lutkenhaus J.** 2002. Dynamic assembly of MinD on phospholipid  
552 vesicles regulated by ATP and MinE. Proc. Natl. Acad. Sci USA **99**:6761-6766.
- 553 41. **Cha J-H, Stewart GC.** 1997. The *divIVA* minicell locus of *Bacillus subtilis*. J Bacteriol  
554 **179**:1671-1683.
- 555 42. **Edwards DH, Errington J.** 1997. The *Bacillus subtilis* DivIVA protein targets to the  
556 division septum and controls site specificity of cell division. Mol Microbiol **24**:905-915.
- 557 43. **Bramkamp M, Emmins R, Weston L, Donovan C, Daniel RA, Errington J.** 2008. A  
558 novel component of the division-site selection system of *Bacillus subtilis* and a new  
559 mode of action for the division inhibitor MinCD. Mol Microbiol **70**:1556-1569.
- 560 44. **Patrick JE, Kearns DB.** 2008. MinJ (YvjD) is a topological determinant of cell division  
561 in *Bacillus subtilis*. Mol Microbiol **70**:1166-1179.
- 562 45. **Harry EJ, Lewis PJ.** 2003. Early targeting of Min proteins to the cell poles in  
563 germinated spores of *Bacillus subtilis*: evidence for division apparatus-independent  
564 recruitment of Min proteins to the division site. Mol Microbiol **47**:37-48.
- 565 46. **Gregory JA, Becker EC, Pogliano K.** 2008. *Bacillus subtilis* MinC destabilizes FtsZ-  
566 rings at new cell poles and contributes to the timing of cell division. Genes Dev **22**:3475-  
567 3488.
- 568 47. **Balaban NQ, Merrin J, Chait R, Kowalik L, Leibler S.** 2004. Bacterial persistence as  
569 a phenotypic switch. Science **305**:1622-1625.
- 570 48. **Wang P, Robert L, Pelletier J, Dang WL, Taddei F, Wright A, Jun S.** 2010. Robust  
571 growth of *Escherichia coli*. Curr Biol **20**:1099-1103.
- 572 49. **Moffitt JR, Lee JB, Cluzel P.** 2012. The single-cell chemostat: an agarose-based,  
573 microfluidic device for high-throughput, single-cell studies of bacteria and bacterial  
574 communities. Lab Chip **12**:1487-1494.
- 575 50. **Norman TM, Lord ND, Paulsson J, Losick R.** 2013. Memory and modularity in cell-  
576 fate decision making. Nature **503**:481-486.
- 577 51. **Long Z, Nugent E, Javer A, Cicuta P, Sclavi B, Cosentino Lagomarsino M, Dorfman**  
578 **KD.** 2013. Microfluidic chemostat for measuring single cell dynamics in bacteria. Lab  
579 Chip **13**:947-954.
- 580 52. **Baker JD, Kysela DT, Zhou J, Madren SM, Wilkens AS, Brun YV, Jacobson SC.**  
581 2016. Programmable, pneumatically actuated microfluidic device with an integrated  
582 nanochannel array to track development of individual bacterial. Anal Chem **88**:8476-  
583 8483.
- 584 53. **Kuru E, Hughes HV, Brown PJ, Hall E, Tekkam S, Cava F, de Pedro MA, Brun YV,**  
585 **Van Nieuwenhze MS.** 2012. In situ probing of newly synthesized peptidoglycan in live  
586 bacteria with fluorescent D-amino acids. Angew Chem Int Ed **51**:12519-12523.



- 587 54. **Kuru E, Tekkam S, Hall E, Brun YV, Van Nieuwenhze MS.** 2015. Synthesis of  
588 fluorescent D-amino acids and their use for probing peptidoglycan synthesis and  
589 bacterial growth *in situ*. *Nat Protocol* **10**:33-52.
- 590 55. **Knaysi G.** 1941. Observations on the cell division of some yeasts and bacteria. *J*  
591 *Bacteriol* **41**:141-153.
- 592 56. **Chapman GB, Hillier J.** 1953. Electron microscopy of ultra-thin sections of bacteria: I.  
593 Cellular division in *Bacillus cereus*. *J Bacteriol* **66**:362-373.
- 594 57. **Nanninga N, Koppes LJH, de Vries-Tijssen FC.** 1979. The cell cycle of *Bacillus*  
595 *subtilis* as studied by electron microscopy. *Arch Microbiol* **123**:173-181.
- 596 58. **Hajduk IV, Mann R, Rodrigues CDA, Harry EJ.** 2019. The ParB homologs, Spo0J  
597 and Noc, together prevent premature midcell Z ring assembly when the early stages of  
598 replication are blocked in *Bacillus subtilis*. *Mol Microbiol* **112**:766-784.
- 599 59. **Pichoff S, Lutkenhaus J.** 2001. *Escherichia coli* division inhibitor MinCD blocks  
600 septation by preventing Z-ring formation. *J Bacteriol* **183**:6630-6635.
- 601 60. **Teather RM, Collins JF, Donachie WD.** 1974. Quantal behavior of a diffusible factor  
602 which initiates septum formation at potential division sites in *Escherichia coli*. *J Bacteriol*  
603 **118**:407-413.
- 604 61. **Levin PA, Shim JJ, Grossman AD.** 1998. Effect of *minCD* on FtsZ ring position and  
605 polar septation in *Bacillus subtilis*. *J Bacteriol* **180**:6048-6051.
- 606 62. **Johnson JE, Lackner LL, de Boer PAJ.** 2002. Targeting of <sup>D</sup>MinC/MinD and  
607 <sup>D</sup>MinC/DicB complexes to septal rings in *Escherichia coli* suggests a multistep  
608 mechanism for MinC-mediated destruction of nascent FtsZ rings. *J Bacteriol* **184**:2951-  
609 2962.
- 610 63. **Donachie WD, Begg KJ.** 1996. "Division potential" in *Escherichia coli*. *J Bacteriol*  
611 **178**:5971-5976.
- 612 64. **Åkerlund T, Bernander R, Nordström K.** 1992. Cell division in *Escherichia coli* *minB*  
613 mutants. *Mol Microbiol* **6**:2073-2083.
- 614 65. **Mauck J, Chan L, Glaser L, Williamson J.** 1972. Mode of cell wall growth of *Bacillus*  
615 *megaterium*. *J Bacteriol* **109**:373-378.
- 616 66. **Burman LG, Raichler J, Park JT.** 1983. Evidence of diffuse growth of the cylindrical  
617 portion of the *Escherichia coli* murein sacculus. *J Bacteriol* **155**:983-988.
- 618 67. **Tiyanont K, Doan T, Lazarus MB, Fang X, Rudner DZ, Walker S.** 2006. Imaging  
619 peptidoglycan biosynthesis in *Bacillus subtilis* with fluorescent antibiotics. *Proc. Natl.*  
620 *Acad. Sci. USA* **103**:11033-11038.
- 621 68. **Jaffé A, Boye E, D'ari R.** 1990. Rule governing the division pattern in *Escherichia coli*  
622 *minB* and wild-type filaments. *J Bacteriol* **172**:3500-3502.
- 623 69. **Campos M, Surovtsev IV, Kato S, Paintdakhi A, Beltran B, Ebmeier SE, Jacobs-**  
624 **Wagner C.** 2014. A constant size extension drives bacterial cell size homeostasis. *Cell*  
625 **159**:1433-1446.
- 626 70. **Si F, Le Treut G, Sauls JT, Vadia S, Levin PA, Jun S.** 2019. Mechanistic origin of  
627 cell-size control and homeostasis in bacteria. *Curr Biol* **29**:1760-1770.
- 628 71. **de Pedro MA, Donachie WD, Holtje J-V, Schwarz H.** 2001. Constitutive septal  
629 murein synthesis in *Escherichia coli* with impaired activity of the morphogenetic proteins  
630 RodA and penicillin-binding protein 2. *J Bacteriol* **183**:4115-4126.
- 631 72. **Mobley HLT, Koch AL, Doyle RJ, Streips UN.** 1984. Insertion and fate of the cell wall  
632 in *Bacillus subtilis*. *J Bacteriol* **158**:169-179.

- 633 73. **Boersma MJ, Kuru E, Rittichier JT, Van Nieuwenhze MS, Brun YV, Winkler ME.**  
634 2015. Minimal peptidoglycan (PG) turnover in wild-type and PG hydrolase and cell  
635 division mutants of *Streptococcus pneumoniae* D39 growing planktonically and in host-  
636 relevant biofilms. *J Bacteriol* **197**:3472-3485.
- 637 74. **Van Baarle S, Bramkamp M.** 2010. The MinCDJ system in *Bacillus subtilis* prevents  
638 minicell formation by promoting divisome disassembly. *PLoS One* **5**:e9850.
- 639 75. **Migocki MD, Freeman MK, Wake G, Harry EJ.** 2002. The Min system is not required  
640 for precise placement of the midcell Z ring in *Bacillus subtilis*. *EMBO rep* **3**:1163-1167.
- 641 76. **Rodrigues CDA, Harry EJ.** 2012. The Min system and nucleoid occlusion are not  
642 required for identifying the division site in *Bacillus subtilis* but ensure its efficient  
643 utilization. *PLoS Genet* **8**:e1002561.
- 644 77. **Eswaramoorthy P, Erb ML, Gregory JA, Silverman J, Pogliano K, Pogliano J,**  
645 **Ramamurthi KS.** 2011. Cellular architecture mediates DivIVA ultrastructure and  
646 regulates Min activity in *Bacillus subtilis*. *mBio* **2**:e00257-11.
- 647 78. **Levin PA, Schwartz RL, Grossman AD.** 2001. Polymer stability plays an important  
648 role in the positional regulation of FtsZ. *J Bacteriol* **183**:5449-5452.
- 649 79. **Yu X-C, Margolin W.** 2000. Deletion of the *min* operon results in increased  
650 thermosensitivity of an *ftsZ84* mutant and abnormal FtsZ ring assembly, placement, and  
651 disassembly. *J Bacteriol* **182**:6203-6213.
- 652 80. **Mulder E, Woldringh CL.** 1989. Actively replicating nucleoids influence positioning of  
653 division sites in *Escherichia coli* filaments forming cells lacking DNA. *J Bacteriol*  
654 **171**:4303-4314.
- 655 81. **Woldringh CL, Mulder E, Huls PG, Vischer N.** 1991. Toporegulation of bacterial  
656 division according to the nucleoid occlusion model. *Res Microbiol* **142**:309-320.
- 657 82. **Sharpe ME, Hauser PM, Sharpe RG, Errington J.** 1998. *Bacillus subtilis* cell cycle as  
658 studied by fluorescence microscopy: constancy of cell length at initiation of DNA  
659 replication and evidence for active nucleoid partitioning. *J Bacteriol* **180**:547-555.
- 660 83. **Moriya S, Rashid RA, Andrade Rodrigues CD, Harry EJ.** 2010. Influence of the  
661 nucleoid and the early stages of DNA replication on positioning the division site in  
662 *Bacillus subtilis*. *Mol Microbiol* **76**:634-647.
- 663 84. **Shiomi D, Sakai M, Niki H.** 2008. Determination of bacterial rod shape by a novel  
664 cytoskeletal membrane protein. *EMBO J* **27**:3081-3091.
- 665 85. **Bendezú FO, Hale CA, Bernhardt TG, de Boer PAJ.** 2009. RodZ (YpfA) is required  
666 for proper assembly of the MreB actin cytoskeleton and cell shape in *E. coli*. *EMBO J*  
667 **28**:193-204.
- 668 86. **Alyahya SA, Alexander R, Costa T, Henriques AO, Emonet T, Jacobs-Wagner C.**  
669 2009. RodZ, a component of the bacterial core morphogenetic apparatus. *Proc Natl*  
670 *Acad Sci USA* **106**:1239-1244.
- 671 87. **Muchová K, Chromiková Z, Valenčíková R, Barák I.** 2018. Interaction of the  
672 morphogenetic protein RodZ with the *Bacillus subtilis* Min system. *Front Microbiol*  
673 **8**:2650.
- 674 88. **Adams DW, Wu LJ, Errington J.** 2015. Nucleoid occlusion protein Noc recruits DNA  
675 to the bacterial cell membrane. *EMBO J* **34**:491-501.

676  
677  
678

679 **FIGURE LEGENDS**

680 **Figure 1: Microfluidic analysis of growth and division in wild type and *min* mutants.**

681 Snapshot fluorescent microscopy of a microfluidic channel for wild type (A,C) and a *minD*  
682 mutant (B,D) growing at steady state. A and B) Fluorescence microscopy of cells in a  
683 microfluidic channel expressing cytoplasmic mCherry protein false colored red (top),  
684 mNeogreen-FtsZ false colored green (middle), and an overlay of the two colors (bottom).  
685 Graphs are a quantitative analysis of mCherry fluorescence intensity (red line) and mNeogreen  
686 fluorescence intensity (green line) to match the fluorescence microscopy images immediately  
687 above. All images are reproduced at the same magnification. C and D) Fluorescence  
688 microscopy of a microfluidic channel for wild type (A,C) and a *minD* mutant (B,D) growing at  
689 steady state. Cytoplasmic mCherry protein false colored red (top), and peptidoglycan stained  
690 with BADA false colored green (bottom). Graphs are a quantitative analysis of mCherry  
691 fluorescence intensity (red) and BADA fluorescence intensity (green) to match the fluorescence  
692 microscopy images immediately above. All images are reproduced at the same magnification.  
693 Wild type (DK5133) and a *minD* mutant (DK5155) were used to generate all of the data in this  
694 figure.

695

696 **Figure 2: Cells mutated for the *min* system divide faster than wild type.** A) A histogram of

697 the division time of individual cells of wild type (gray) and a *minD* mutant (blue) measured by  
698 microscopic analysis. Division events were defined by a local 20% decrease in mCherry  
699 (cytoplasmic) fluorescence intensity below a threshold value. More than 3000 division events  
700 were counted per dataset. Minicells were excluded from the division time analysis as once they  
701 are formed, minicells never divide. B) A histogram of division time of individual cells of the  
702 *minD* mutant using the dataset in panel A to separately determine the time elapsed between  
703 medial and minicell divisions. The time between medial division events (cyan) was determined  
704 as those events that gave rise to two separate cells with chromosomes. The time between

705 minicell divisions (magenta) was determined to be the time between the formation of a cell pole  
706 and the formation of a division plane at that pole to give rise to a minicell. C) Cell elongation  
707 rates were measured as the rate at which the cell poles moved apart from one another in wild  
708 type (gray) and a *minD* mutant (blue). The growth of over 2500 cells was measured for each  
709 strain. Minicells were excluded from the elongation rate analysis as once they formed, minicells  
710 do not elongate. D) Data from panel 2C was replotted as the instantaneous increase in cell  
711 length per total length of the cell observed. E) Growth curve of wild type (gray) and a *minD*  
712 mutant (blue) growing in highly agitated LB broth at 37°C and optical density was measured with  
713 a spectrophotometer at 600 nm wavelength. Wild type (DK5133) and a *minD* mutant (DK5155)  
714 were used to generate all of the data in this figure. F) Frequency histogram of division time that  
715 gives rise to minicells at either the old cell pole (yellow) or the new cell pole (violet). Old cell  
716 poles were defined by the pole that last experienced a polar division event. New cell poles were  
717 defined by the pole that had not previously experienced a polar division event.

718

719 **Figure 3. FtsZ foci remain at the poles indefinitely in the absence of Min.** Kymograph  
720 analysis of wild type (A) and a *minD* mutant (B) of cytoplasmic mCherry signal false colored red  
721 (top) and mNeogreen-FtsZ intensity false colored green (middle), and an overlay of the red  
722 and green channels (bottom). In each panel a single microfluidic channel was followed in a  
723 series of stacked snapshots taken at 2 minute intervals to assemble the kymograph. All images  
724 reproduced at the same magnification. Wild type (DK5133) and a *minD* mutant (DK5155) were  
725 used to generate all of the data in this figure.

726

727 **Figure 4: The cytokinetic period is longer than a cell cycle in a *minD* mutant.** Top)  
728 Sample kymograph analysis of a wild type (A) and a *minD* mutant (B) microfluidic channel in  
729 which cytoplasmic mCherry signal is false colored red (left) and overlaid with mNeogreen-  
730 FtsZ that is false colored green (right). Events necessary for defining division parameters are

731 indicated and labeled a, septation; b, detection of a nascent Z-ring; c, disappearance of a Z-ring;  
732 d, FtsZ peak intensity achieved. Thin white lines are include to indicate cell tracking and lineage  
733 analysis. Middle) Graphs of 100 manually tracked wild type (gray) and *minD* (blue) cell cycles  
734 presented as bars of average values and whiskers of standard deviation for the following  
735 parameters: “Cell cycle” is the time between septation events (between consecutive “a” events);  
736 Z-ring appearance period is the time between the formation of one Z-ring and another (between  
737 consecutive “b” events); “Z-ring persistence period” is the time between the formation of a Z-ring  
738 and the disappearance of that Z-ring (between consecutive “b” and “c” events); “Z-ring polar  
739 duration” is the time between a septation event and the disappearance of the Z-ring resulting  
740 from that septation events (between consecutive “a” and “c” events); “Z-ring medial delay” is the  
741 time between a septation event and the formation of a Z-ring that will eventually give rise to the  
742 next medial division event (between an “a” event and a “b” event that will give rise to the next  
743 round of septation); “Z-ring maturation period” is the time between Z-ring formation and when  
744 that Z-ring achieves peak local intensity (between consecutive “a” and “d” events); and the  
745 “cytokinetic period” is the time between Z-ring formation and septation directed by that Z-ring  
746 (between a “b” event and the “a” event that is caused by that particular Z-ring). The raw data  
747 histograms for each bar are presented in Fig S2. Bottom) Timeline representations of the  
748 various events indicated in the bar graph depicted in cartoon form, color coded to match the  
749 indicated parameter of like color above, and annotated with relevant events marked by the  
750 defining letters.

751

752 **Figure 5: FtsZ density is constant in both the wild type and the *minD* mutant.** A) A  
753 frequency histogram of the location of snapshot peak FtsZ intensity plotted relative to total cell  
754 length for wild type. The poles of the cell have relative position values of 0 and 1.0 whereas the  
755 midcell has a value of 0.5. B) A frequency histogram of cell length distribution of wild type  
756 (gray) and a *minD* mutant (blue). The *minD* mutant has two peaks, a shorter peak

757 corresponding to “minicells” and a longer peak corresponding to “mother” cells that have  
758 chromosomes and are capable of division. C) A frequency histogram of the location of  
759 snapshot peak FtsZ intensity plotted relative to total cell length for *minD*. D) A frequency  
760 histogram of peak FtsZ fluorescence intensity per cell. For each frame, a line scan through the  
761 longitudinal axis of the cell determined the location of peak fluorescence intensity and peak  
762 fluorescence magnitude was recorded. Wild type distribution (gray); *minD* distribution (blue).  
763 E) A frequency histogram of total FtsZ fluorescence intensity per cell was measured by  
764 integrating the area under the line scans from panel D. F) A frequency histogram of total  
765 fluorescence intensity was divided by cell length for each individual. Measurements were taken  
766 for 9000 cells of growing wild type (DK5133) amounting to over 30,000 measurements, and  
767 3000 cells of growing *minD* (DK5155) for over 20,000 measurements to generate the data in  
768 this figure.

769

770 **Figure 6. Some cells of a *minD* mutant experience multiple simultaneous division.**

771 Kymograph analysis of cytoplasmic mCherry fluorescence intensity of single channels of a wild  
772 type (left) or *minD* (middle and right) mutant. Wild type cells experience regular division once  
773 per cell cycle (caret, left panel) but occasionally multiple simultaneous (carets middle panel) or  
774 slightly offset (carets right panel) division events were observed in the *minD* mutant. The  
775 presented kymographs of individual wells were representative of general trends taken from the  
776 image stacks generated in Figure 1. Wild type (DK5133) and a *minD* mutant (DK5155) were  
777 used to generate all of the data in this figure.

778

779 **Figure 7. *minD* mutants lose BADA staining fluorescence intensity faster than the wild**

780 **type.** Cells were grown in the presence of the peptidoglycan synthesis/remodeling indicator  
781 stain BADA for 4 minutes, the stain was washed out of the microfluidic device for 8 minutes and  
782 then fluorescence intensity was tracked in time. A) A graph of the total BADA intensity per cell



783 per the length of the cell measured in the first frame of the experiment. Each dot represents an  
784 individual cell of wild type (gray) and *minD* mutant (blue). B) A graph of the total BADA intensity  
785 per cell per unit time after washout of fluorescent D-amino acids. Gray, wild type; Blue; *minD*  
786 mutant, Cyan, mother cells of the *minD* mutant with chromosomes, and magenta, minicells of  
787 the *minD* mutant. C) A graph of the rate of decrease in BADA intensity loss as measured by  
788 the slope of the lines in Figure 7B. D) A representative kymograph of wild type after BADA  
789 washout. E) A representative kymograph of *minD* after BADA washout. The wild type  
790 (DK4393) and *minD* mutant (DK4407) strains were used for all panels in this figure. Over 500  
791 measurements were taken for each strain.

792

793 **Figure 8. Recently formed minicells are proficient for remodeling of the polar**  
794 **peptidoglycan.** A) Microfluidic analysis of a *minD* (DK4407) mutant expressing cytoplasmic  
795 mCherry false colored red (left) and stained for 20 minutes with the fluorescent D-amino acid  
796 BADA false colored green (right). Individual areas of the channels are highlighted by white  
797 boxes and numbered. Below are enlarged images of the boxes with the corresponding number  
798 to increase detail.

799

800 **Figure S1. Diagram of the microfluidic device.** Black lines indicate microfluidic channels.  
801 Open circles indicate media/reagent input/output reservoirs. Closed circles indicate the location  
802 of peristaltic valves. Three valves in parallel indicate a peristaltic pump. Location of the  
803 nanochannel array imaged by fluorescence microscopy indicated by a red box. The same  
804 device was used previously in (Baker et al., 2016).

805

806 **Figure S2.** Data histograms of FtsZ parameters used to generate Figure 4. 100 cells were  
807 manually tracked and measured through a cell cycle to generate the data for each panel. Data  
808 are presented as gray bars for wild type (DK5133) and as blue bars for the *minD* mutant

809 (DK5155). A) Frequency histogram of the Z-ring appearance period defined as the time  
810 between the formation of one Z-ring and the next Z-ring. B) Frequency histogram of the Z-ring  
811 persistence period defined by the time between the formation of a Z-ring and the disappearance  
812 of that Z-ring. Note, no data are provided for the *minD* mutant as the Z-rings of a *minD* mutant  
813 did not disappear and the persistence period was effectively infinite. C) Frequency histogram  
814 of the Z-ring polar duration defined as the time between a septation event and the  
815 disappearance of the Z-ring resulting from that septation events. Note, no data are provided for  
816 the *minD* mutant as the Z-rings of a *minD* mutant did not disappear and the polar duration  
817 period was effectively infinite. D) Frequency histogram of the Z-ring medial delay defined as  
818 the time between a septation event and the formation of a Z-ring that will eventually give rise to  
819 the next medial division event. Note that the Z-ring medial delay of the *minD* mutant was often  
820 negative because the medial Z-ring that would eventually promote cell division was formed in  
821 the preceding generation. E) Frequency histogram of the Z-ring maturation period defined as  
822 the time between Z-ring formation and when that Z-ring achieves peak local intensity. F)  
823 Frequency histogram of the cytokinetic period defined as the time between Z-ring formation and  
824 septation directed by that Z-ring.

825

826 **Figure S3. The *minD* mutant accumulates and loses fluorescent BADA signal more**  
827 **rapidly than the wild type.** A) Total BADA fluorescence intensity after a 4-min staining  
828 impulse and washout of the BADA stain in the wild type (DK4393). Points are the average, and  
829 whiskers are the standard deviation of over 500 measurements. B) Total BADA fluorescence  
830 intensity after a 4-minute staining impulse and washout of the BADA stain in the *minD* mutant  
831 (DK4407). Points are the average, and whiskers are the standard deviation of over 500  
832 measurements. Cyan indicates measurements of the long mother cells with nucleoids, and  
833 magenta indicates measurements of minicells.

834



835 **Figure S4. A minicell redistributed peptidoglycan stain from its old cell pole to its new**  
836 **cell pole.** Cells were stained with BADA for 4 min, then media lacking BADA was introduced to  
837 wash out the dye, and a kymograph of one channel was generated. Here, we highlight an  
838 instance in which a minicell was formed by polar division soon after the dye had been removed  
839 such that old pole was stained but the division plane and resulting new pole was not (white  
840 caret). Over time, the fluorescent signal incorporated into the peptidoglycan becomes uniformly  
841 redistributed around the circumference of the minicell (black caret).

842

843 **Movie S1: Wild type growth in microfluidic channels.** Constitutive cytoplasmic mCherry,  
844 false colored red. Strain DK5133. Movies are 200 frames over 400 min at a rate of 1 frame/2  
845 min.

846

847 **Movie S2: Wild type growth in microfluidic channels with fluorescent FtsZ.** Constitutive  
848 cytoplasmic mCherry, false colored red, and a mNeogreen-FtsZ, false colored green. Strain  
849 DK5133. Movies are 200 frames over 400 min at a rate of 1 frame/2 min.

850

851

852 **Movie S3: *minD* mutant growth in microfluidic channels.** Constitutive cytoplasmic mCherry,  
853 false colored red. Strain DK5155. Movies are 200 frames over 400 min at a rate of 1 frame/2  
854 min.

855

856 **Movie S4: *minD* mutant growth in microfluidic channels with fluorescent FtsZ.**  
857 Constitutive cytoplasmic mCherry, false colored red, and a mNeogreen-FtsZ, false colored  
858 green. Strain DK5155. Movies are 200 frames over 400 min at a rate of 1 frame/2 min.

859

860 **Movie S5: Wild type growth in microfluidic channels with fluorescent BADA that stains**  
861 **newly synthesized/remodeled peptidoglycan.** Constitutive cytoplasmic mCherry, false  
862 colored red, and stained with a 4 minute pulse of BADA, false colored green. Strain DK4393.  
863 BADA was washed out of the channel for 4 minutes after which, imaging was recommenced.  
864 Movies are 60 frames over 120 min at a rate of 1 frame/2 min.

865

866 **Movie S6: *minD* growth in microfluidic channels with fluorescent BADA that stains newly**  
867 **synthesized/remodeled peptidoglycan.** Constitutive cytoplasmic mCherry, false colored red,  
868 and stained with a 4 minute pulse of BADA, false colored green. Strain DK4407. BADA was  
869 washed out of the channel for 4 minutes after which, imaging was recommenced. Movies are  
870 60 frames over 120 min at a rate of 1 frame/2 min.

871

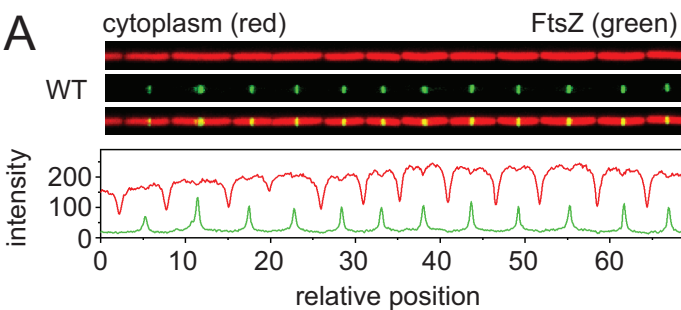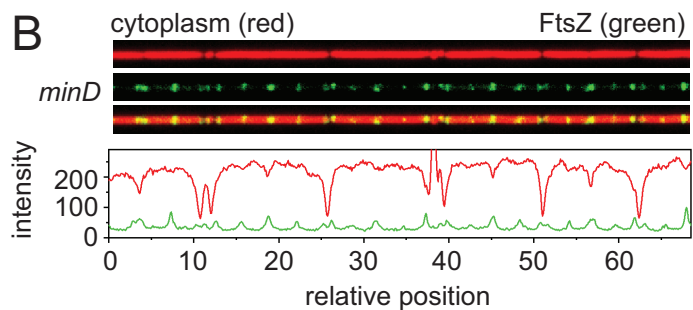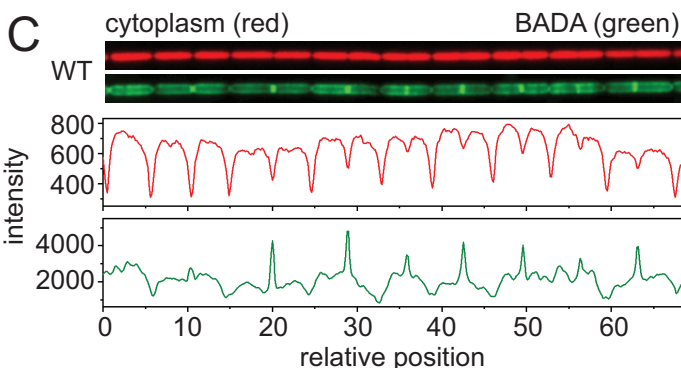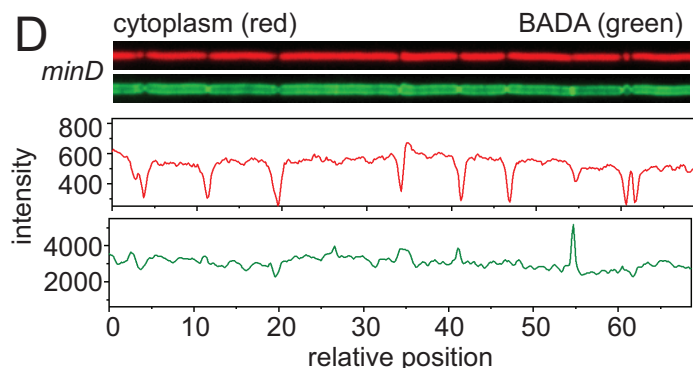

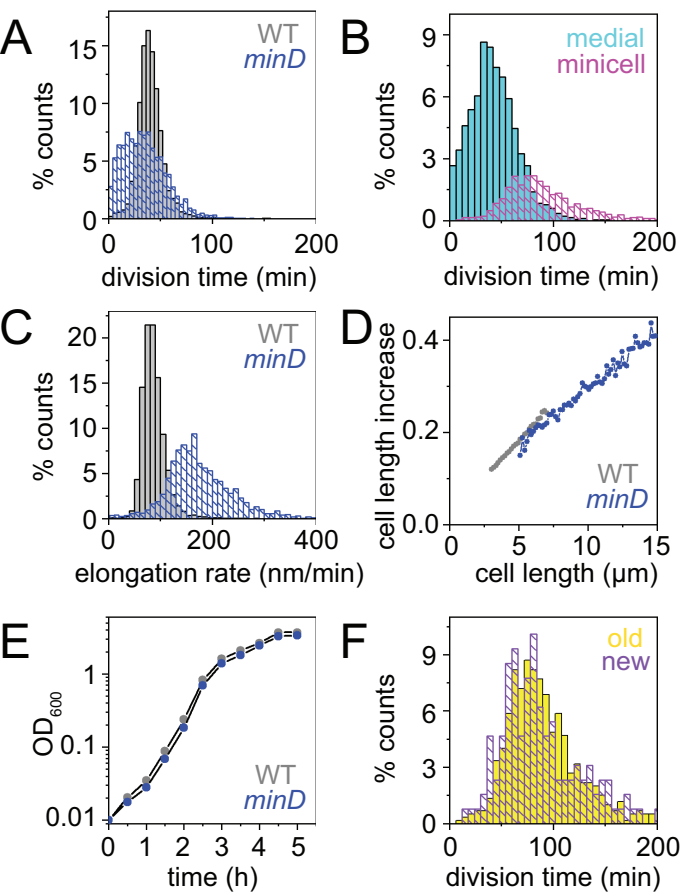

## Figure 3

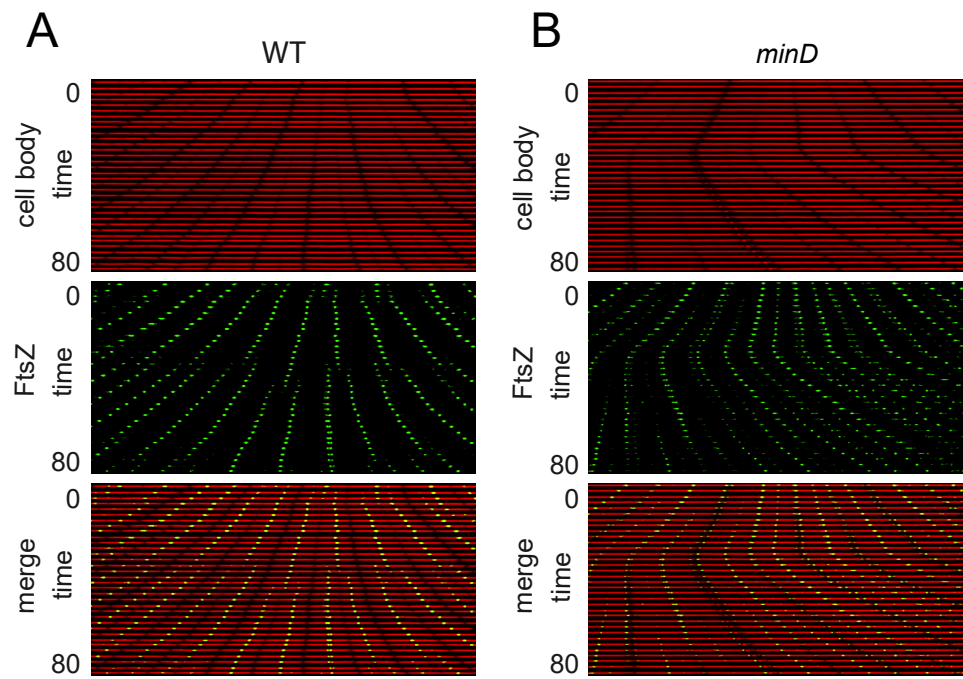

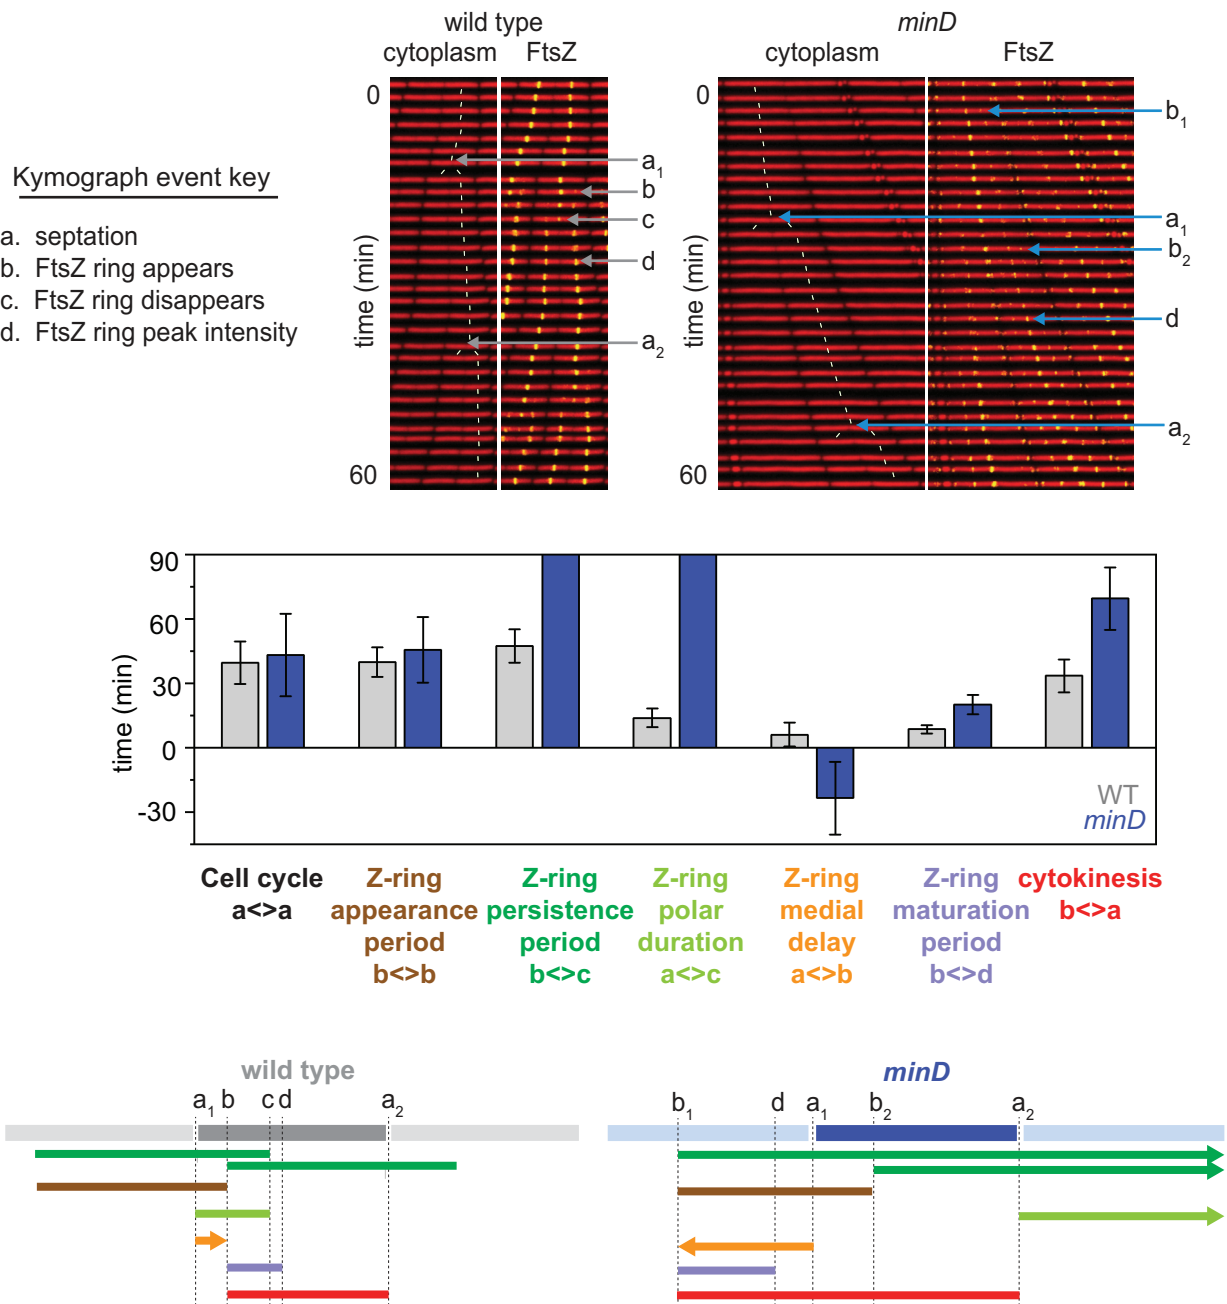

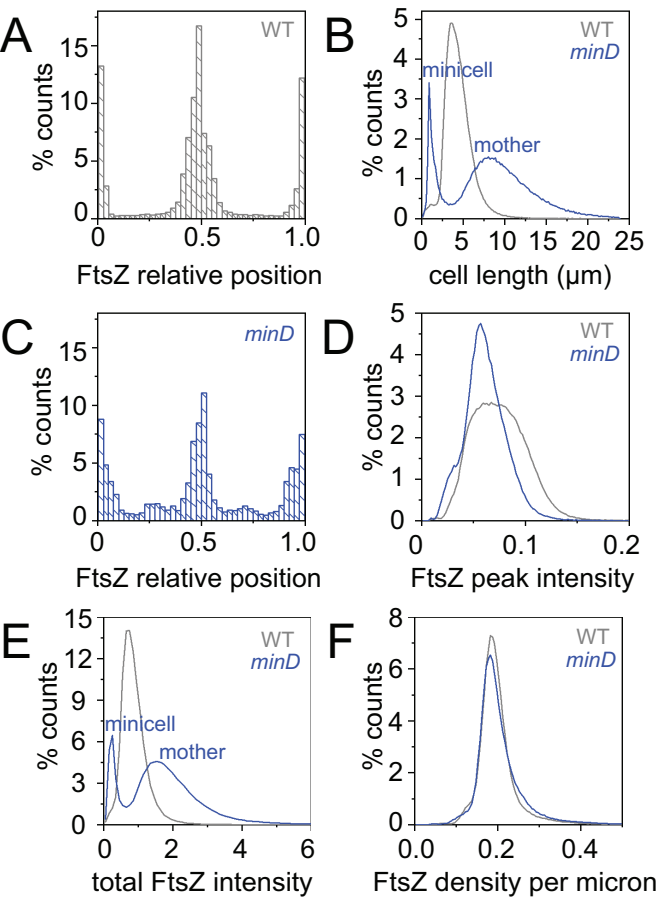

Figure 6

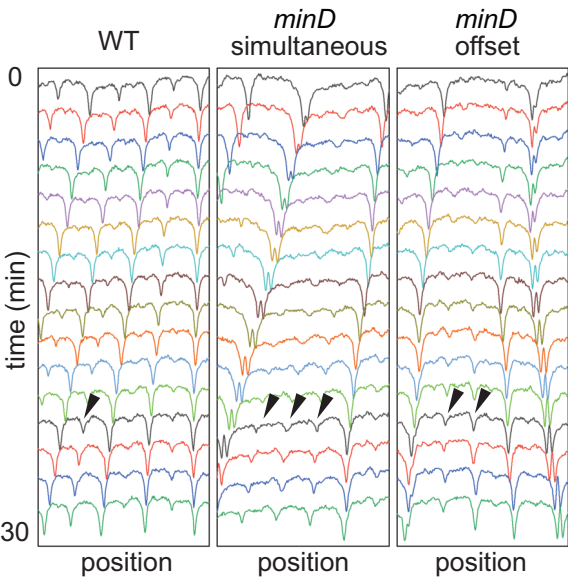



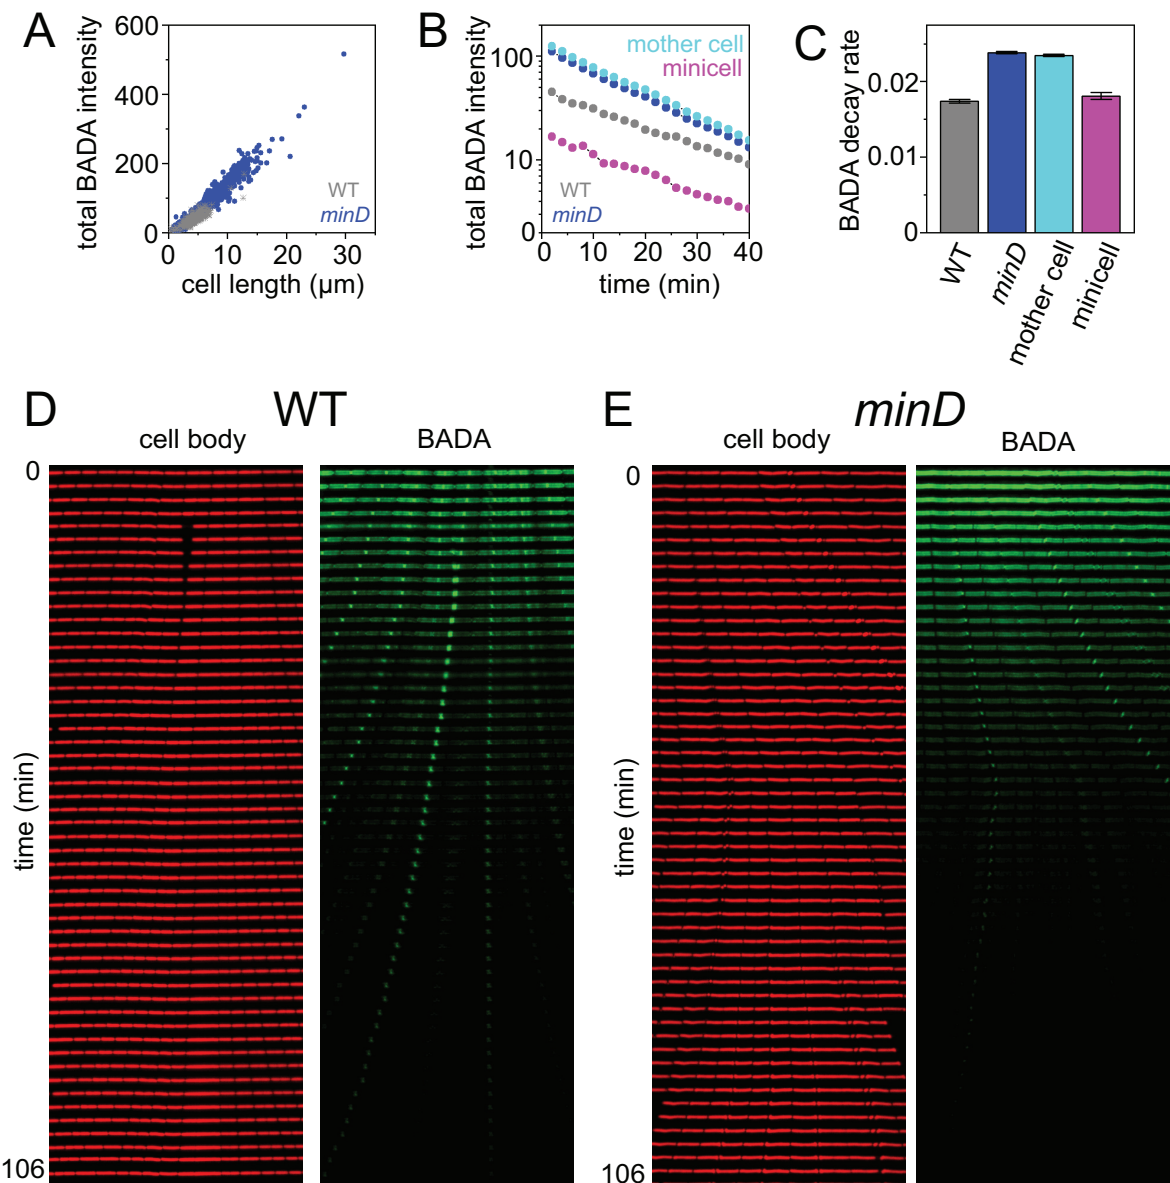

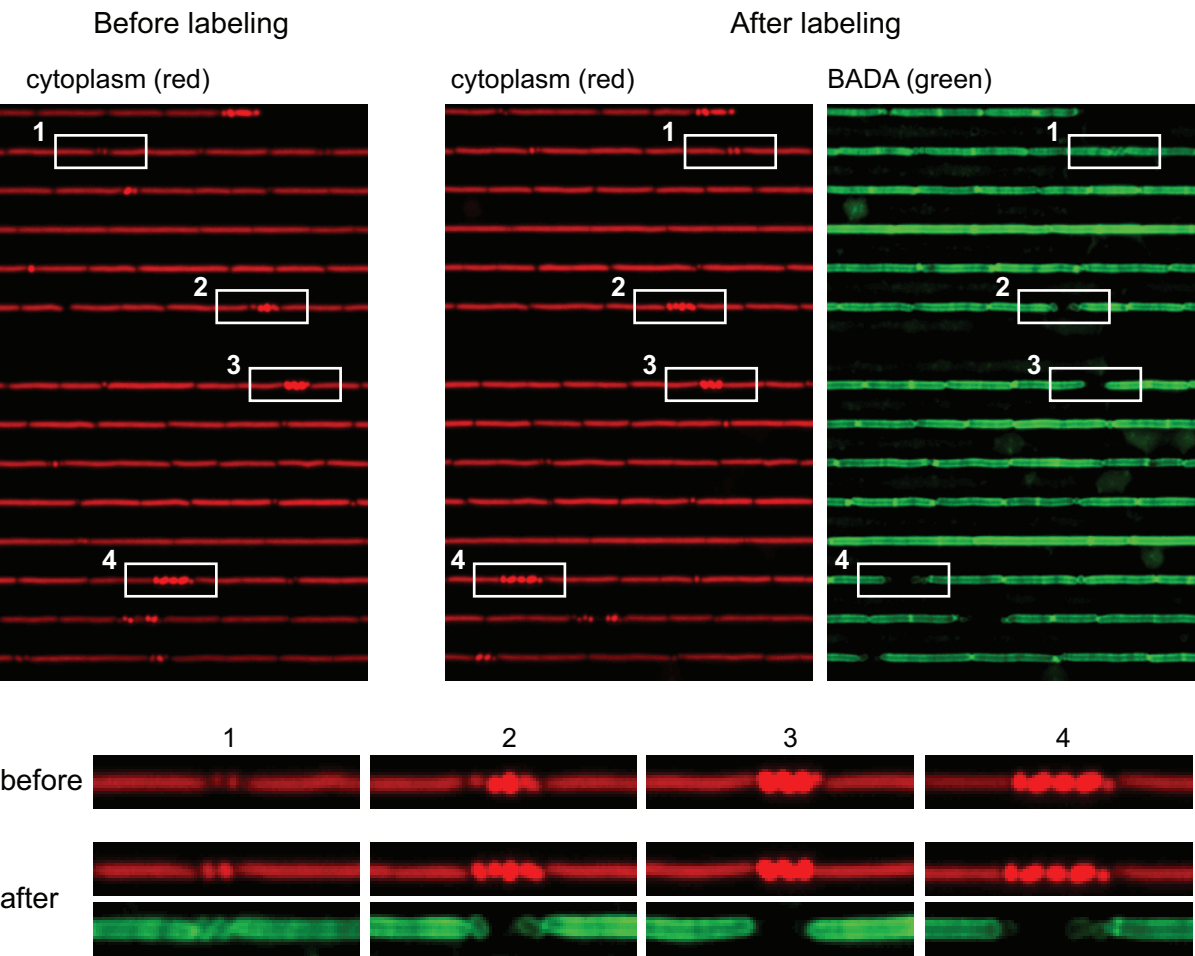

Source: https://www.biorxiv.org/content/10.1101/872325v1.full.pdf
